# Supplementary material
Source: publisher figshare collection journal article supplement (https://plos.figshare.com/articles/dataset/_/7787084)
Supplement: Supplementary file 1 [file 1]

Archive with 10 entries (10 files):
- pone.0212676.s001.pdf
- pone.0212676.s002.pdf
- pone.0212676.s003.pdf
- pone.0212676.s004.pdf
- pone.0212676.s005.pdf
- pone.0212676.s006.pdf
- pone.0212676.s007.pdf
- pone.0212676.s008.pdf
- pone.0212676.s009.pdf
- pone.0212676.s010.doc
