# Supplementary material
Source: publisher figshare collection journal article supplement (https://plos.figshare.com/articles/dataset/_/7787084)

**Supporting information Figure 1**

Timeline showing the time points of mGFR measurements as well as blood and urine sampling.

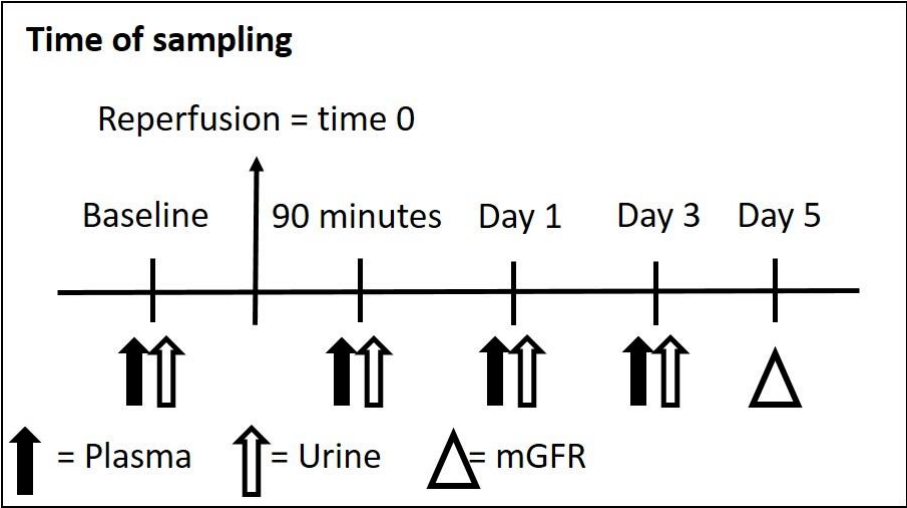

Supplement: Supplementary file 1 [file 1 › pone.0212676.s001.pdf]
