# Supplementary material
Source: publisher figshare collection journal article supplement (https://plos.figshare.com/articles/dataset/_/7787084)

## Supporting information Figure 2

Biomarker levels (A: P-NGAL; B: U-NAGL; C: U-LABP, D: U-Cystatin C, E: U-YKL-40) depending on the intervention (ischemic conditioning (rIC)). No differences are observed in relation to intervention. White boxes=non-rIC. Black boxes=rIC.

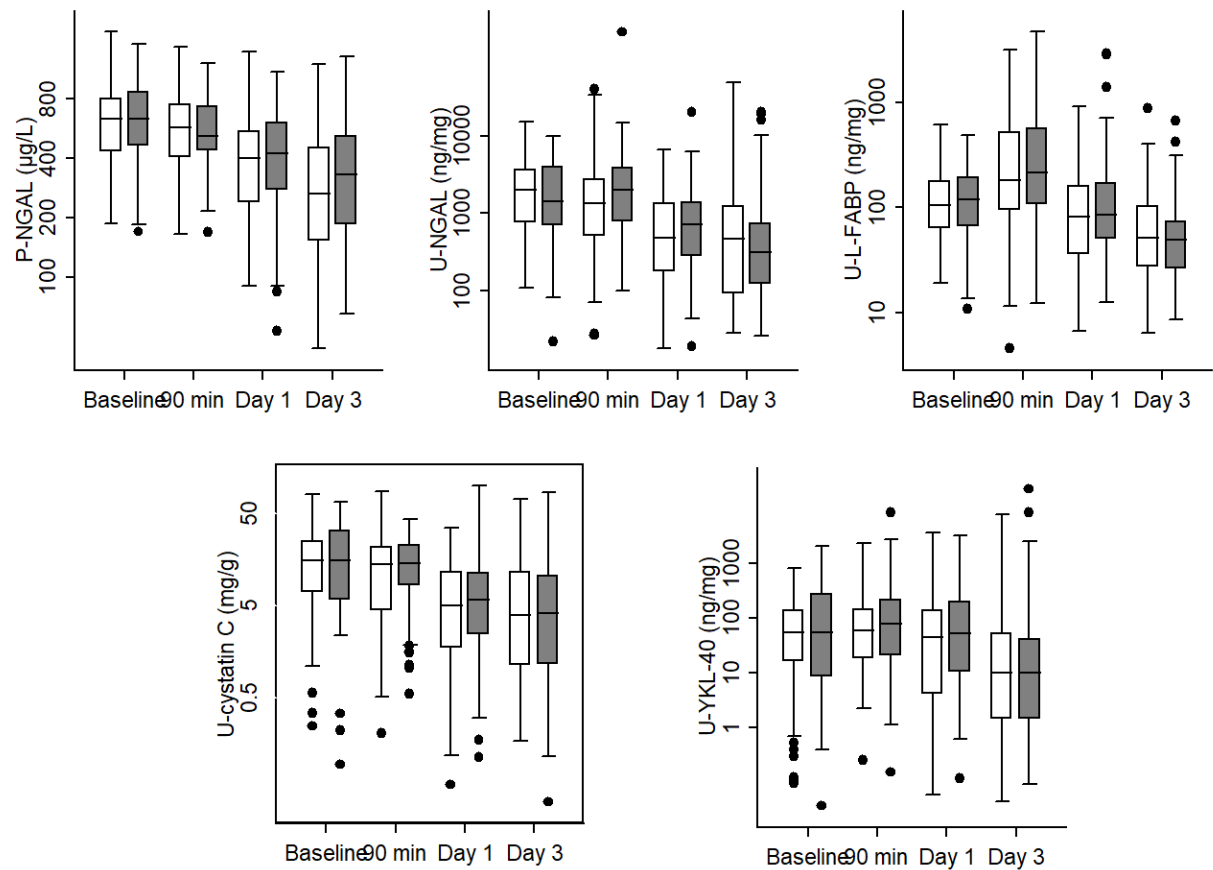

Supplement: Supplementary file 1 [file 1 › pone.0212676.s002.pdf]
