# Supplementary material
Source: publisher figshare collection journal article supplement (https://plos.figshare.com/articles/dataset/_/7787084)

### Supporting information Figure 3

P-NGAL measured on Day 1 as a function of the elapsed time between kidney graft reperfusion and blood sampling. There is no significant correlation between P-NGAL-level and the time elapsed between reperfusion and first sampling for patients without DGF (●) and only a very weak, negative correlation for patients with DGF (x).

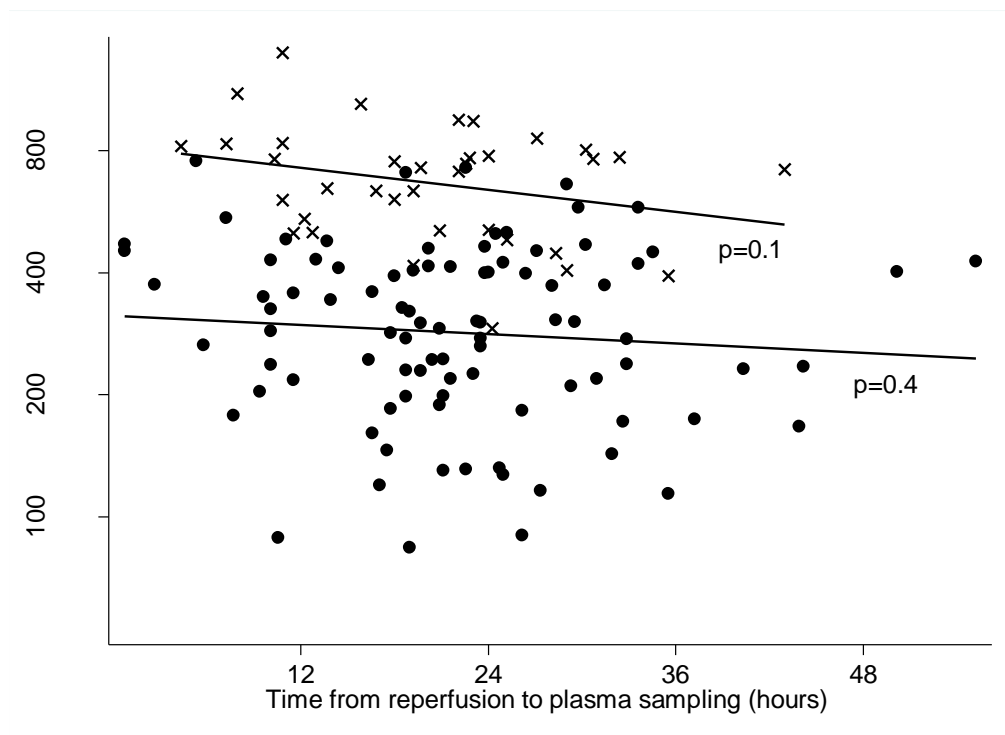

Supplement: Supplementary file 1 [file 1 › pone.0212676.s003.pdf]
