# Supplementary material
Source: publisher figshare collection journal article supplement (https://plos.figshare.com/articles/dataset/_/7787084)

**Supporting information Figure 5**

ROC-analyses showing the ability of the urinary biomarkers on day 1 to predict DGF after transplantation.

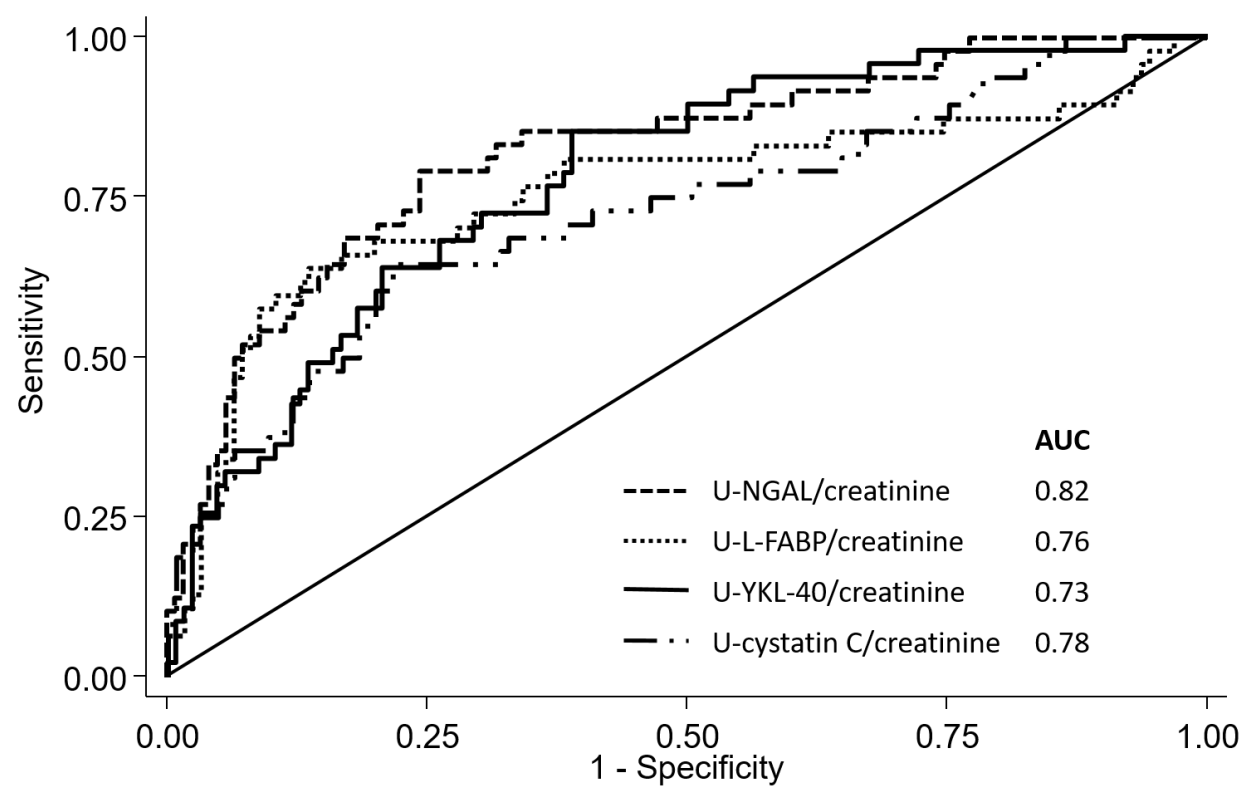

Supplement: Supplementary file 1 [file 1 › pone.0212676.s005.pdf]
