# Supplementary material
Source: publisher figshare collection journal article supplement (https://plos.figshare.com/articles/dataset/_/7787084)

## Supporting information Figure 6

The correlation between cold ischemia time and U-L-FABP at 90 min and 1 day after reperfusion. Only a very weak correlation was identified (90 min:  $r=-0.20$ ;  $p=0.02$ ; Day 1:  $r=0.22$ ;  $p=0.003$ ).

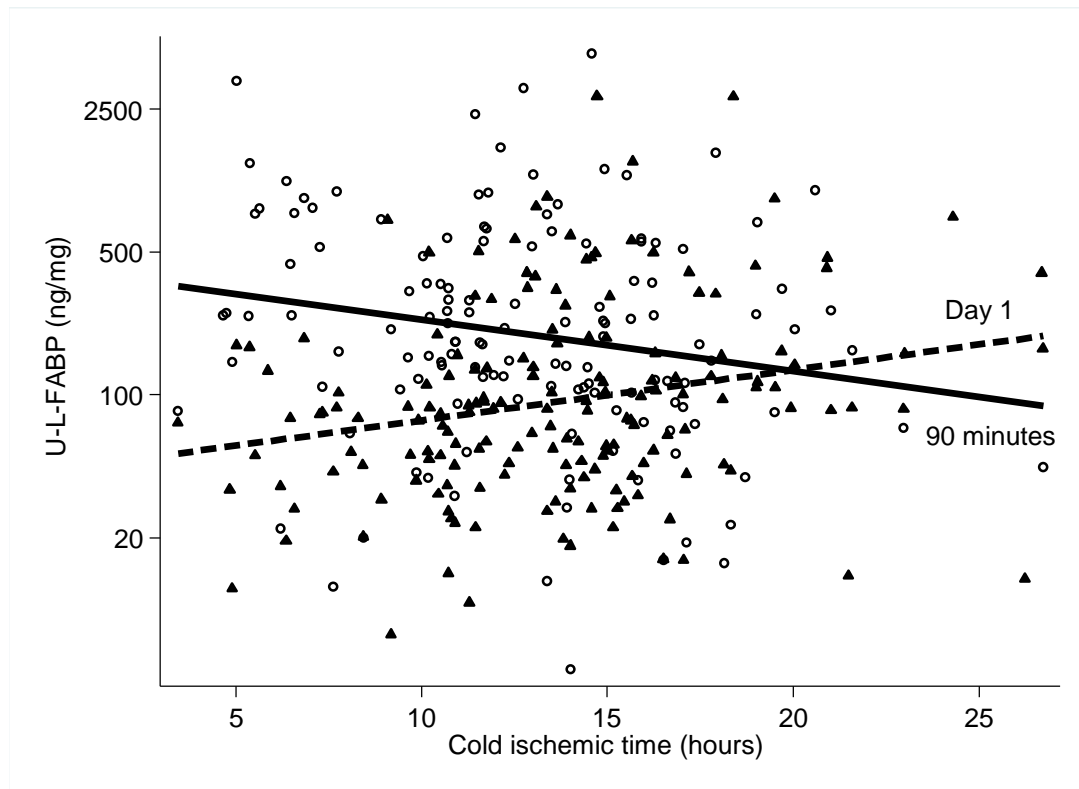

Supplement: Supplementary file 1 [file 1 › pone.0212676.s006.pdf]
