# Supplementary material
Source: publisher figshare collection journal article supplement (https://plos.figshare.com/articles/dataset/_/7787084)
Supplement: Supplementary file 1 [file 1 › pone.0212676.s007.pdf]

## Supporting information Table 1

The correlation between urinary biomarker levels and mGFR at Day 5 or tCr50. Only weak correlations were observed between selected biomarkers at various sampling points and mGFR at Day 5 or tCr50. <sup>a</sup>U-NGAL, U-L-FABP, U-cystatin C, U-YKL-40 and U-albumin combined using multiple linear regression. All biomarkers were normalized to U-creatinine.

|                                    | Time of sampling | mGFR day 5 |        |                                | tCr50 |        |                                |
|------------------------------------|------------------|------------|--------|--------------------------------|-------|--------|--------------------------------|
|                                    |                  | n          | p      | r <sup>2</sup> <sub>adj.</sub> | n     | p      | r <sup>2</sup> <sub>adj.</sub> |
| U-NGAL (ng/mg)                     | 90 minutes       | 73         | 0.02   | 0.06                           | 132   | 0.23   | 0.00                           |
|                                    | Day 1            | 72         | <0.001 | 0.19                           | 166   | <0.001 | 0.18                           |
|                                    | Day 3            | 73         | <0.001 | 0.15                           | 161   | <0.001 | 0.20                           |
| U-L-FABP (ng/mg)                   | 90 minutes       | 73         | 0.13   | 0.02                           | 132   | 0.51   | 0.00                           |
|                                    | Day 1            | 74         | 0.40   | 0.00                           | 168   | <0.001 | 0.07                           |
|                                    | Day 3            | 75         | 0.97   | -0.01                          | 161   | 0.005  | 0.04                           |
| U-cystatin C (mg/g)                | 90 minutes       | 73         | 0.10   | 0.02                           | 132   | 1.00   | 0.00                           |
|                                    | Day 1            | 73         | 0.01   | 0.09                           | 168   | <0.001 | 0.08                           |
|                                    | Day 3            | 76         | <0.001 | 0.17                           | 162   | <0.001 | 0.15                           |
| U-YKL-40 (ng/mg)                   | 90 minutes       | 73         | 0.16   | 0.01                           | 133   | 0.54   | 0.00                           |
|                                    | Day 1            | 74         | 0.01   | 0.07                           | 168   | <0.001 | 0.15                           |
|                                    | Day 3            | 74         | 0.13   | 0.02                           | 160   | <0.001 | 0.16                           |
| U-albumin/creatinine (mg/g)        | 90 minutes       | 73         | 0.94   | -0.01                          | 133   | 0.84   | 0.00                           |
|                                    | Day 1            | 74         | 0.01   | 0.07                           | 169   | <0.001 | 0.17                           |
|                                    | Day 3            | 76         | 0.42   | 0.00                           | 164   | <0.001 | 0.10                           |
| U-biomarkers combined <sup>a</sup> | Day 1            | 72         | 0.003  | 0.19                           | 165   | 0.001  | 0.25                           |
|                                    | Day 3            | 71         | 0.57   | 0.26                           | 155   | 0.24   | 0.19                           |
