# Supplementary material
Source: publisher figshare collection journal article supplement (https://plos.figshare.com/articles/dataset/_/7787084)
Supplement: Supplementary file 1 [file 1 › pone.0212676.s008.pdf]

## Supporting information Table 2

The correlations of the urinary biomarkers and mGFR at Day 5 or tCr50 without normalization of the biomarkers to U-creatinine.

|                     | Time of sampling | mGFR Day 5 |        |              | tCr50 |        |              |
|---------------------|------------------|------------|--------|--------------|-------|--------|--------------|
|                     |                  | n          | p      | $r^2_{adj.}$ | n     | p      | $r^2_{adj.}$ |
| U-NGAL (µg/L)       | 90 minutes       | 75         | 0.14   | 0.01         | 137   | 0.57   | -0.01        |
|                     | Day 1            | 72         | <0.001 | 0.17         | 166   | <0.001 | 0.13         |
|                     | Day 3            | 73         | <0.001 | 0.16         | 161   | <0.001 | 0.21         |
| U-L-FABP (ng/ml)    | 90 minutes       | 74         | 0.73   | -0.01        | 136   | 0.12   | 0.01         |
|                     | Day 1            | 74         | 0.46   | -0.01        | 168   | 0.05   | 0.02         |
|                     | Day 3            | 76         | 0.93   | -0.01        | 162   | 0.01   | 0.04         |
| U-Cystatin C (mg/L) | 90 minutes       | 74         | 0.70   | -0.01        | 136   | 0.23   | 0.00         |
|                     | Day 1            | 73         | 0.01   | 0.09         | 168   | 0.01   | 0.04         |
|                     | Day 3            | 76         | <0.001 | 0.20         | 162   | <0.001 | 0.18         |
| U-YKL-40 (pg/ml)    | 90 minutes       | 74         | 0.50   | -0.01        | 137   | 0.83   | -0.01        |
|                     | Day 1            | 74         | 0.01   | 0.07         | 168   | <0.001 | 0.12         |
|                     | Day 3            | 75         | 0.11   | 0.02         | 161   | <0.001 | 0.17         |
